# Supplementary material for: Constitutive or Induced HIF-2 Addiction is Involved in Resistance to Anti-EGFR Treatment and Radiation Therapy in HNSCC
Source: MDPI journal article supplement (doi:10.3390/cancers11101607), 2019-10-21

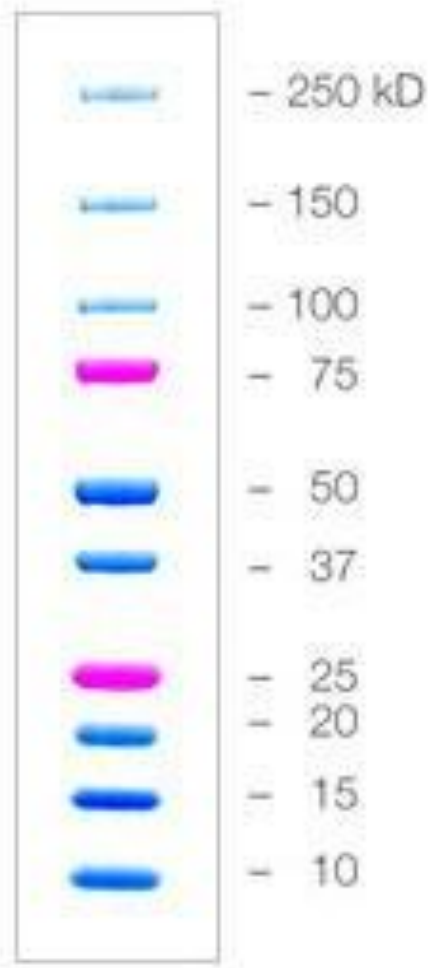

The Biorad dual color protein ladder was used in all western blot analyses (with the exception of the analysis of total S6RP protein)

After protein transfer, membranes were cut under the level of the 75 kD band. Upper parts of the membranes (*i.e.* proteins with molecular weight > 75kD) were incubated with the anti-HIF-1 $\alpha$  or anti-HIF-2 $\alpha$  or anti-HIF $\beta$  antibodies. Lower parts of the membranes (*i.e.* proteins with molecular weight < 75kD) were incubated with anti-actin and anti-pS6RP antibodies.

Above image found at:

<https://www.labx.com/item/precision-plus-protein-dual-color-standards-500-181/4215091>

Western blots Figure 2C

Blot probed with anti-HIF-1 $\alpha$  antibody

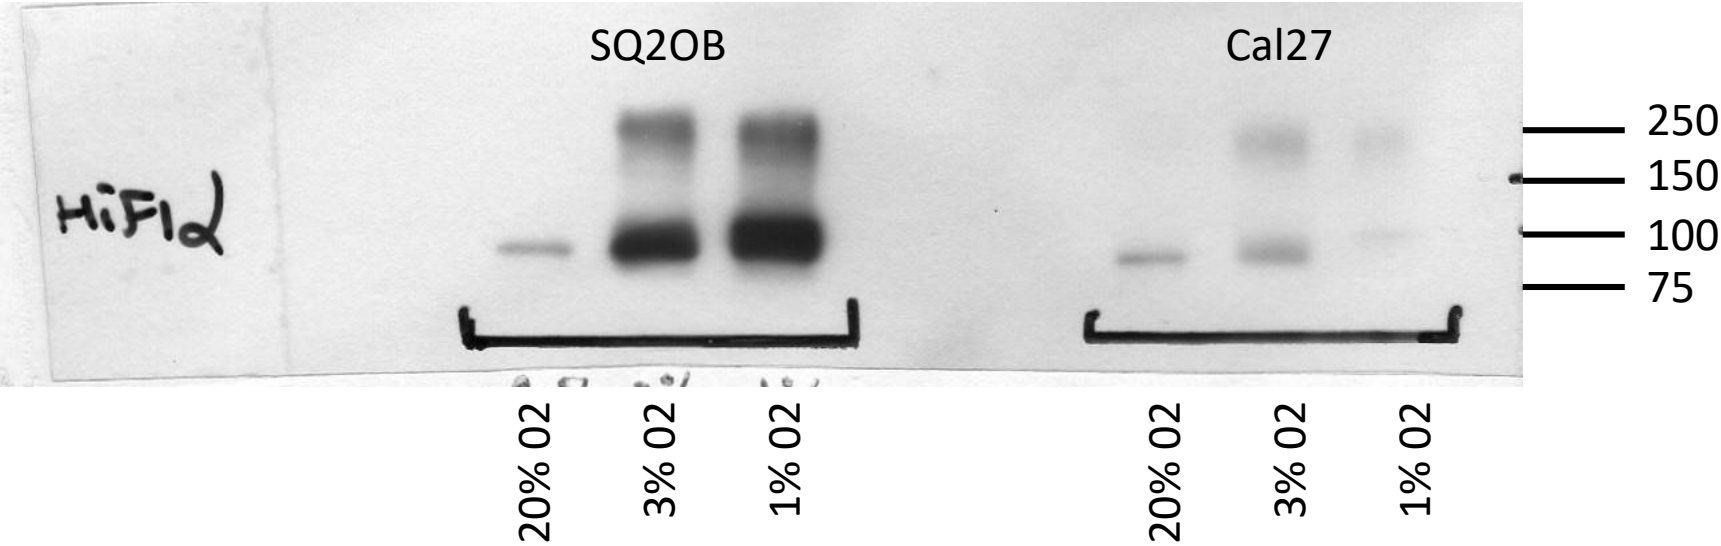

Blot probed with anti-actin antibody

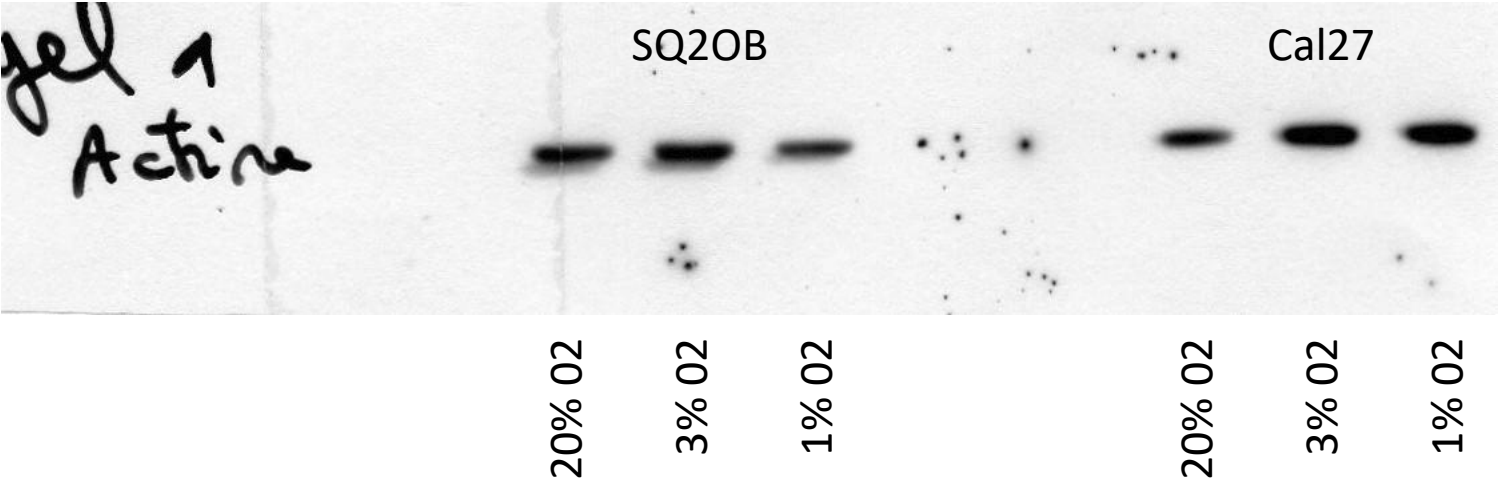

Original blots were cut according to the molecular weight scale and incubated independently with anti-HIF-1 $\alpha$  and anti-actin antibodies

Western blots Figure 3C

Blot probed with  
anti-HIF-2 $\alpha$  antibody

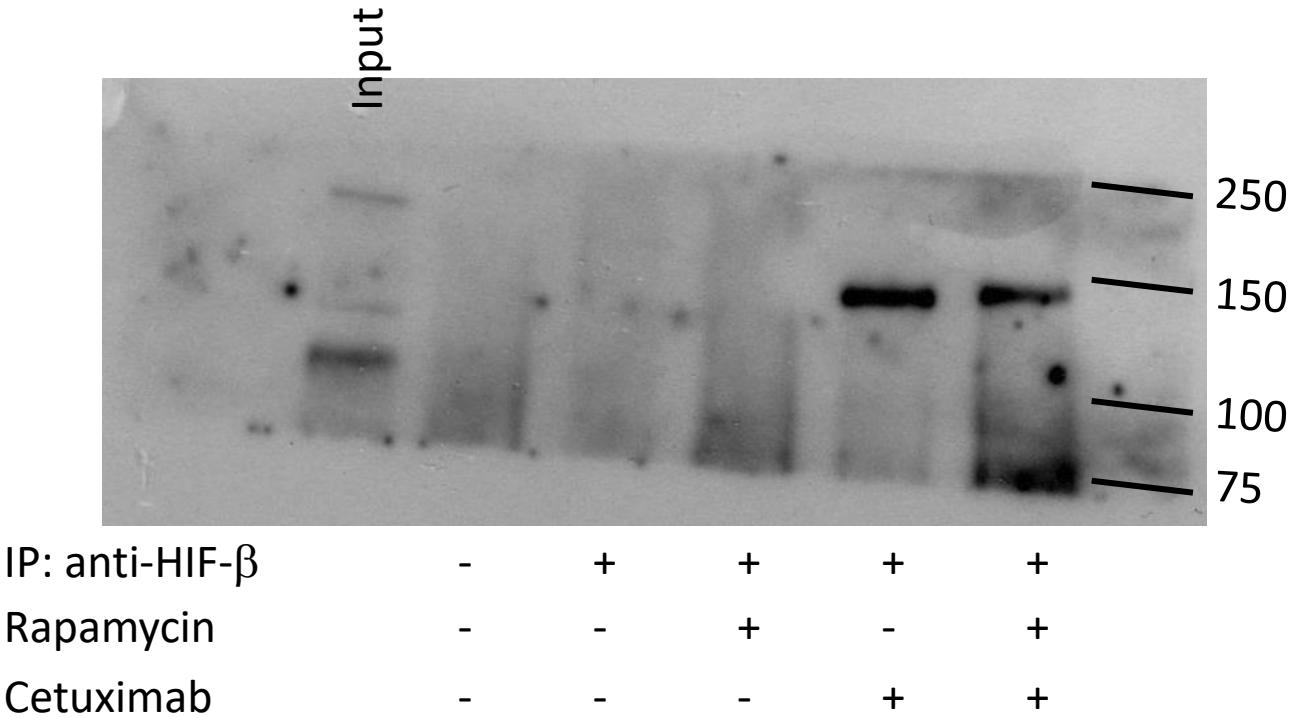

Blot probed with  
anti-HIF- $\beta$  antibody

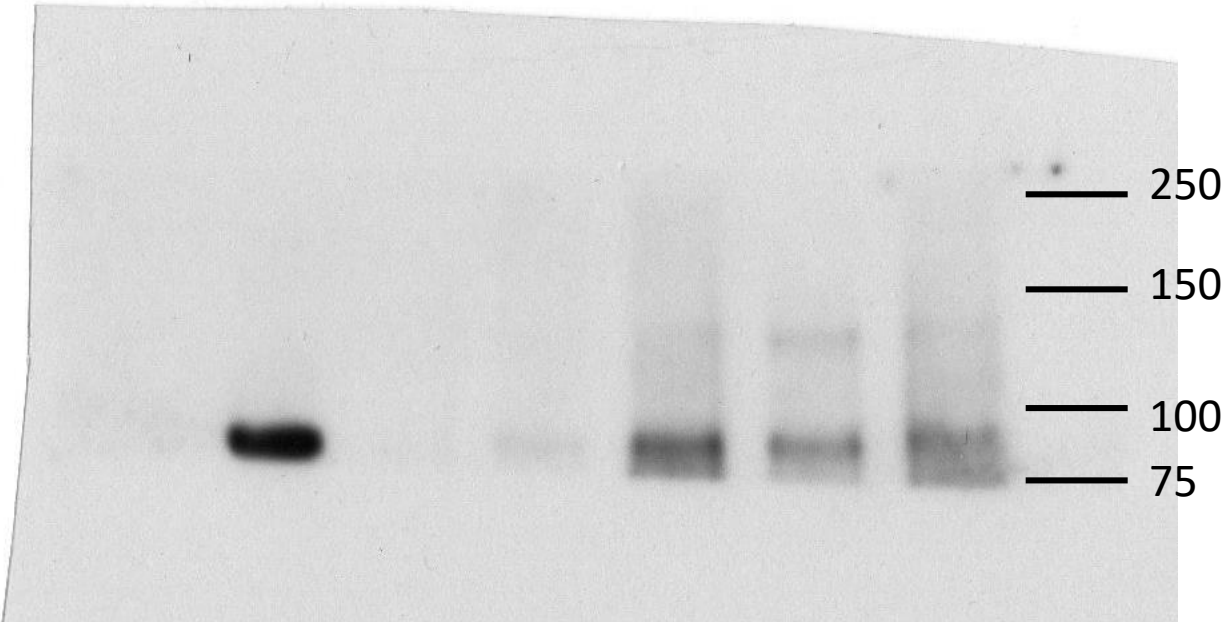

Western blots Figure S1C– Cal27 cell line

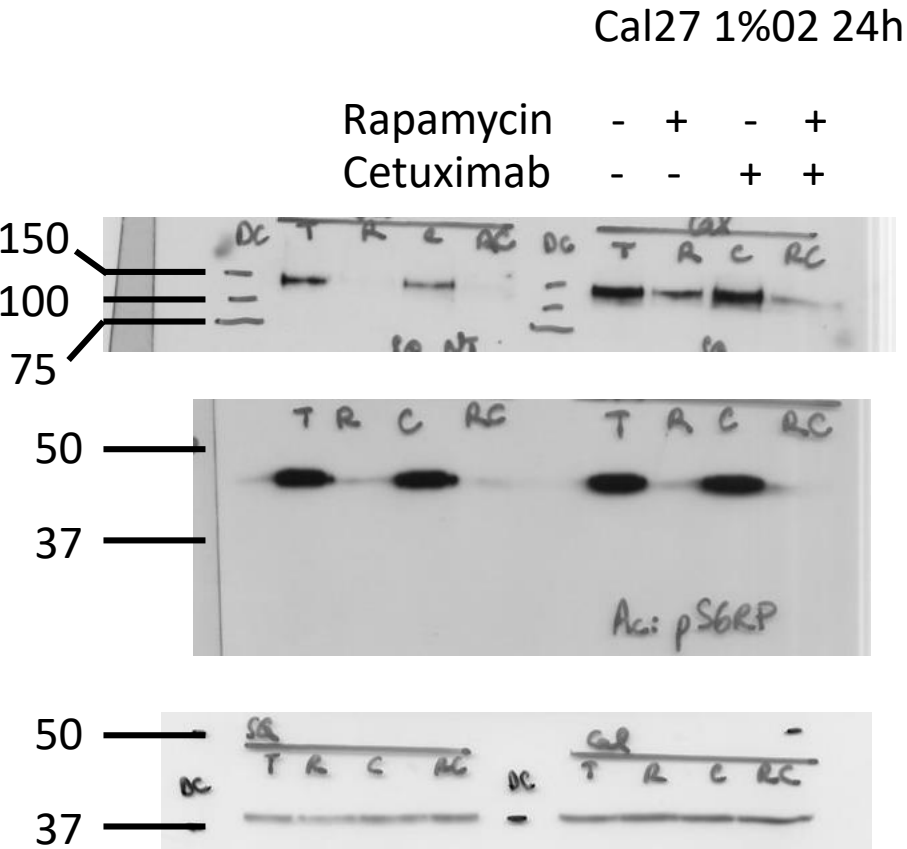

Blots probed with  
anti-HIF-1α antibody

Blots probed with  
anti-pS6RP antibody

Blots probed with  
anti-actin antibody

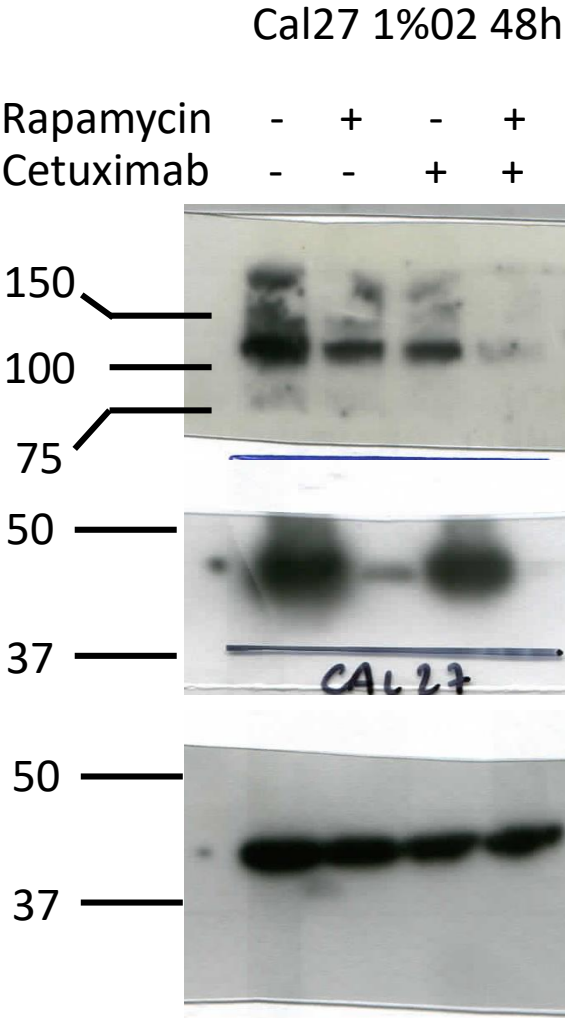

Western blots Figure S1C– SQ20B cell line

|           | SQ20B 1%O <sub>2</sub> 24h |   |   |   | SQ20B 1%O <sub>2</sub> 48h |   |   |   |
|-----------|----------------------------|---|---|---|----------------------------|---|---|---|
| Rapamycin | -                          | + | - | + | -                          | + | - | + |
| Cetuximab | -                          | - | + | + | -                          | - | + | + |

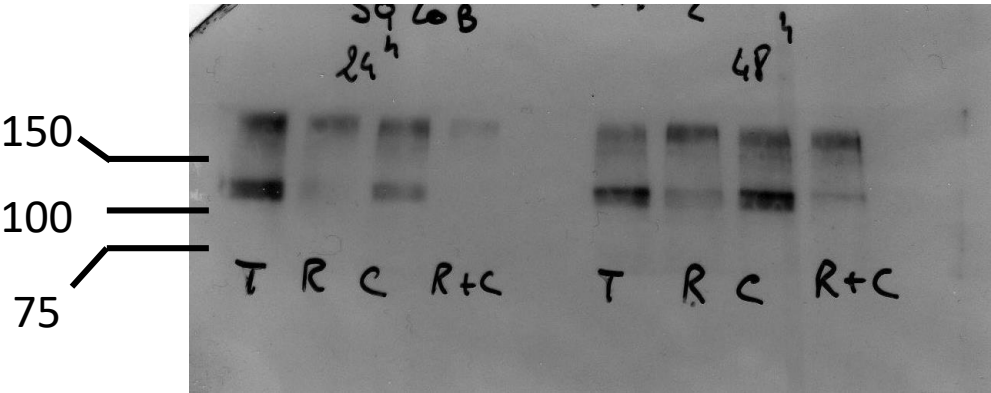

Blots probed with anti-HIF-1α antibody

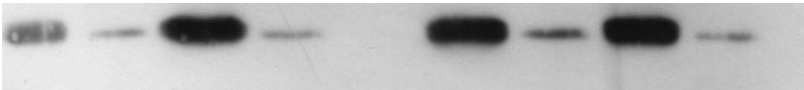

Blots probed with anti-pS6RP antibody

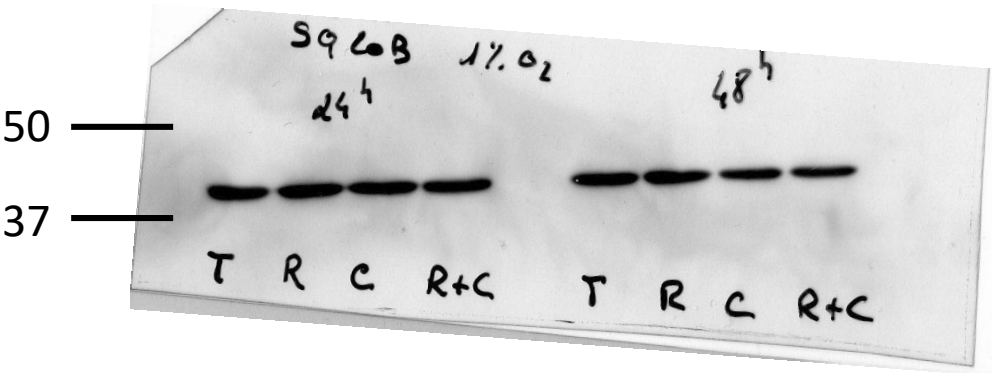

Blots probed with anti-actin antibody

Western blots Figure S1C– Cal27 cell line –S6RP antibody

During the review process, we performed Western blot analyses of whole protein extracts of SQ20B and Cal27 cells by probing membranes with an anti-total S6RP protein. We used the Protein Ladder Prestained (Euromedex) as a molecular weight marker.

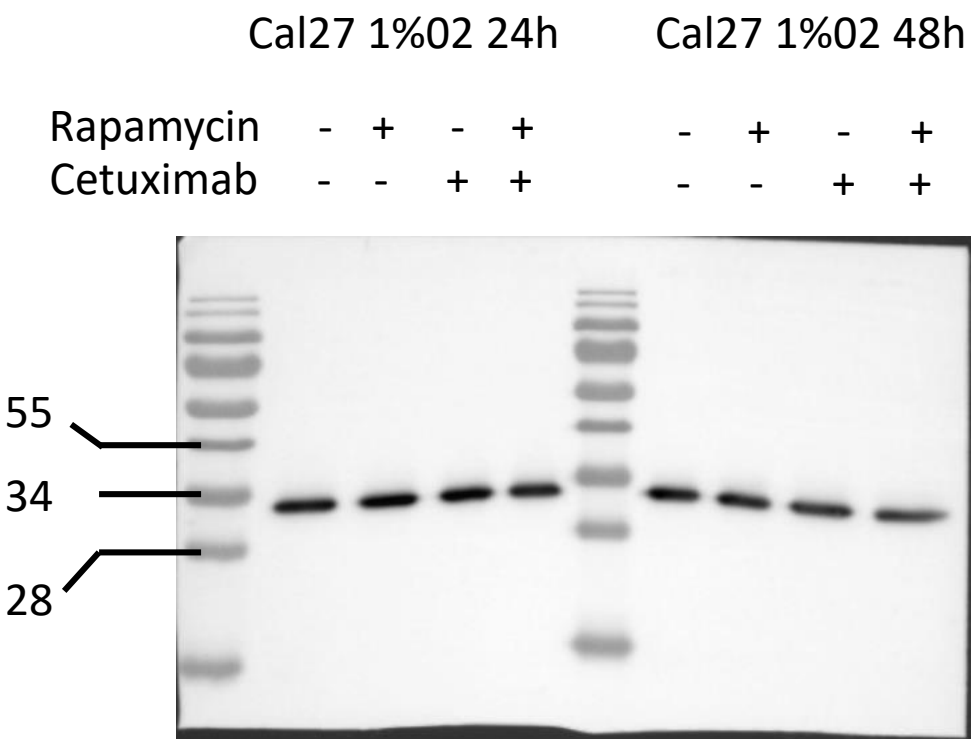

**Western blots Figure S1C– SQ20B cell line –S6RP antibody**

During the review process, we performed Western blot analyses of whole protein extracts of SQ20B and Cal27 cells by probing membranes with an anti-total S6RP protein. We used the Protein Ladder Prestained (Euromedex) as a molecular weight marker.

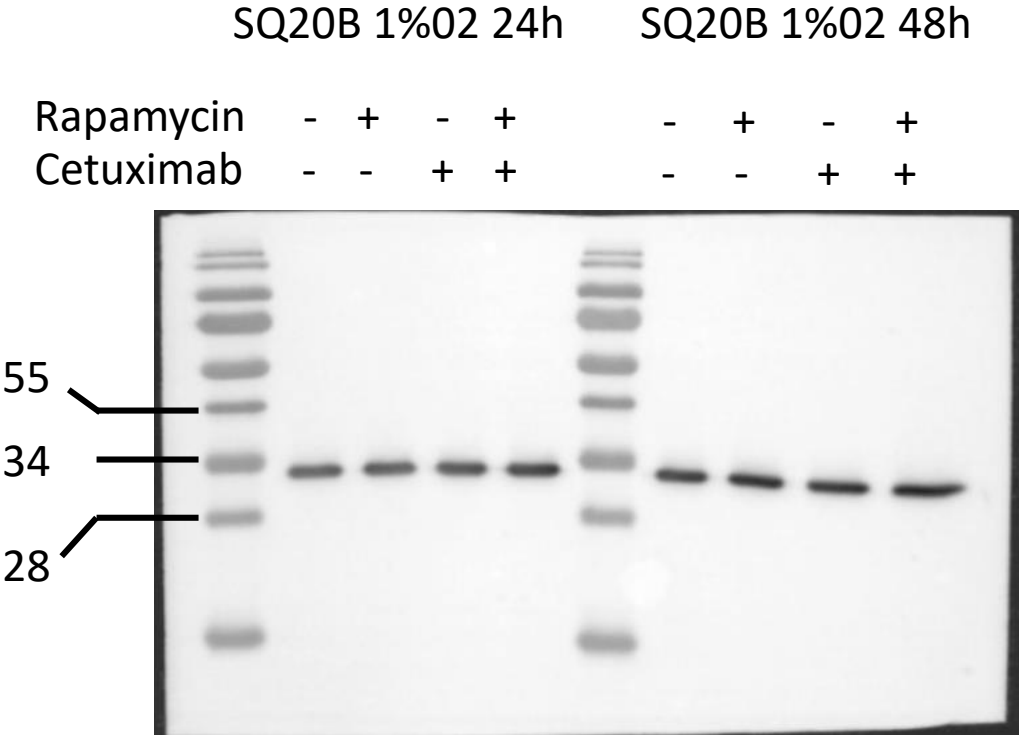

Western blots Figure S5B

Blots probed with  
anti-HIF-2 $\alpha$  antibody

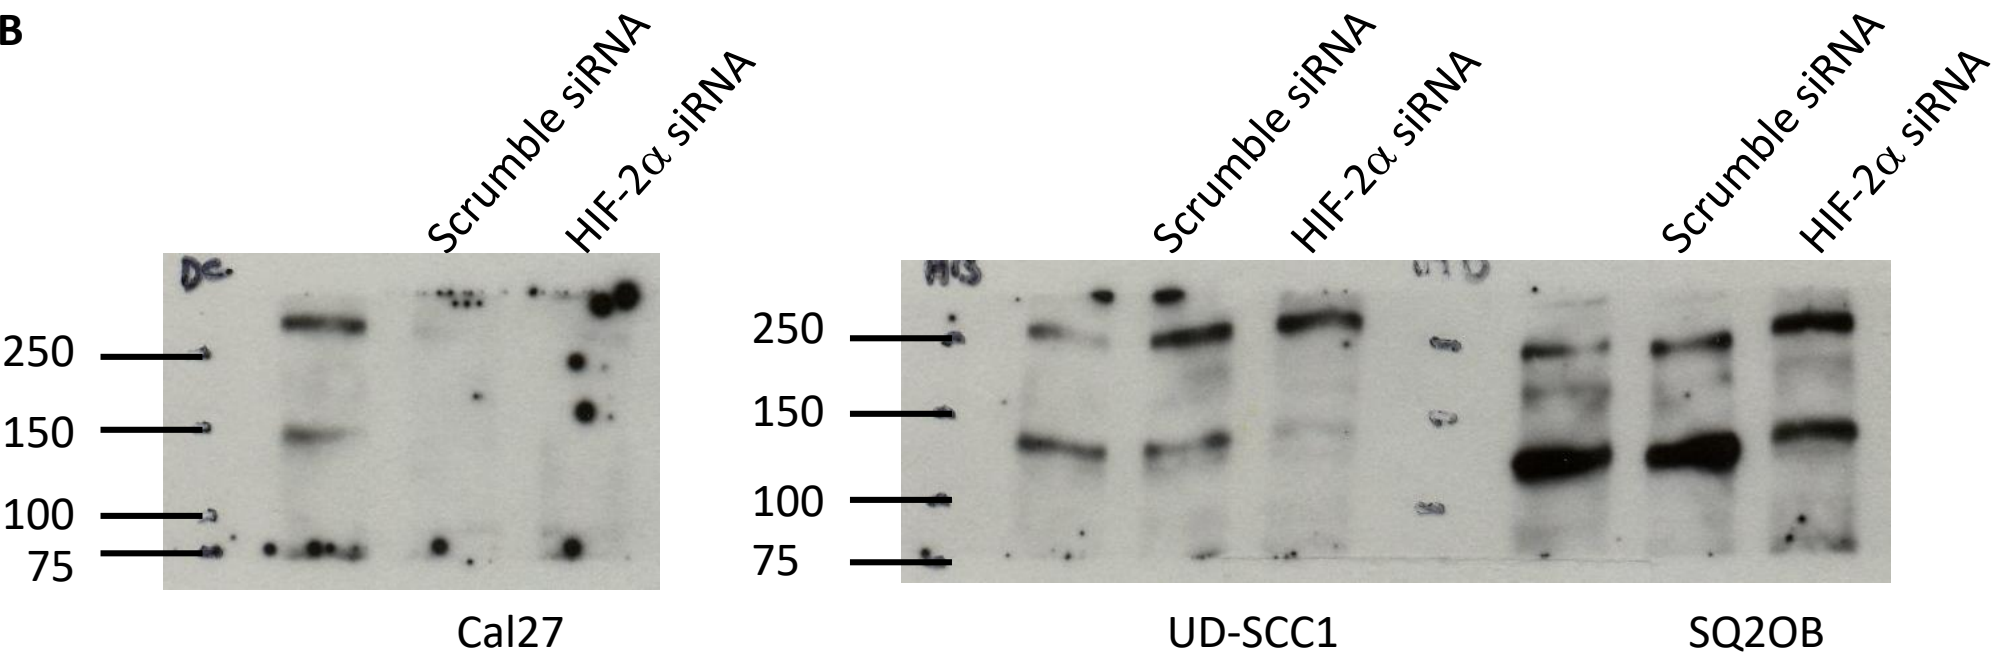

Blots probed with  
anti-actin antibody

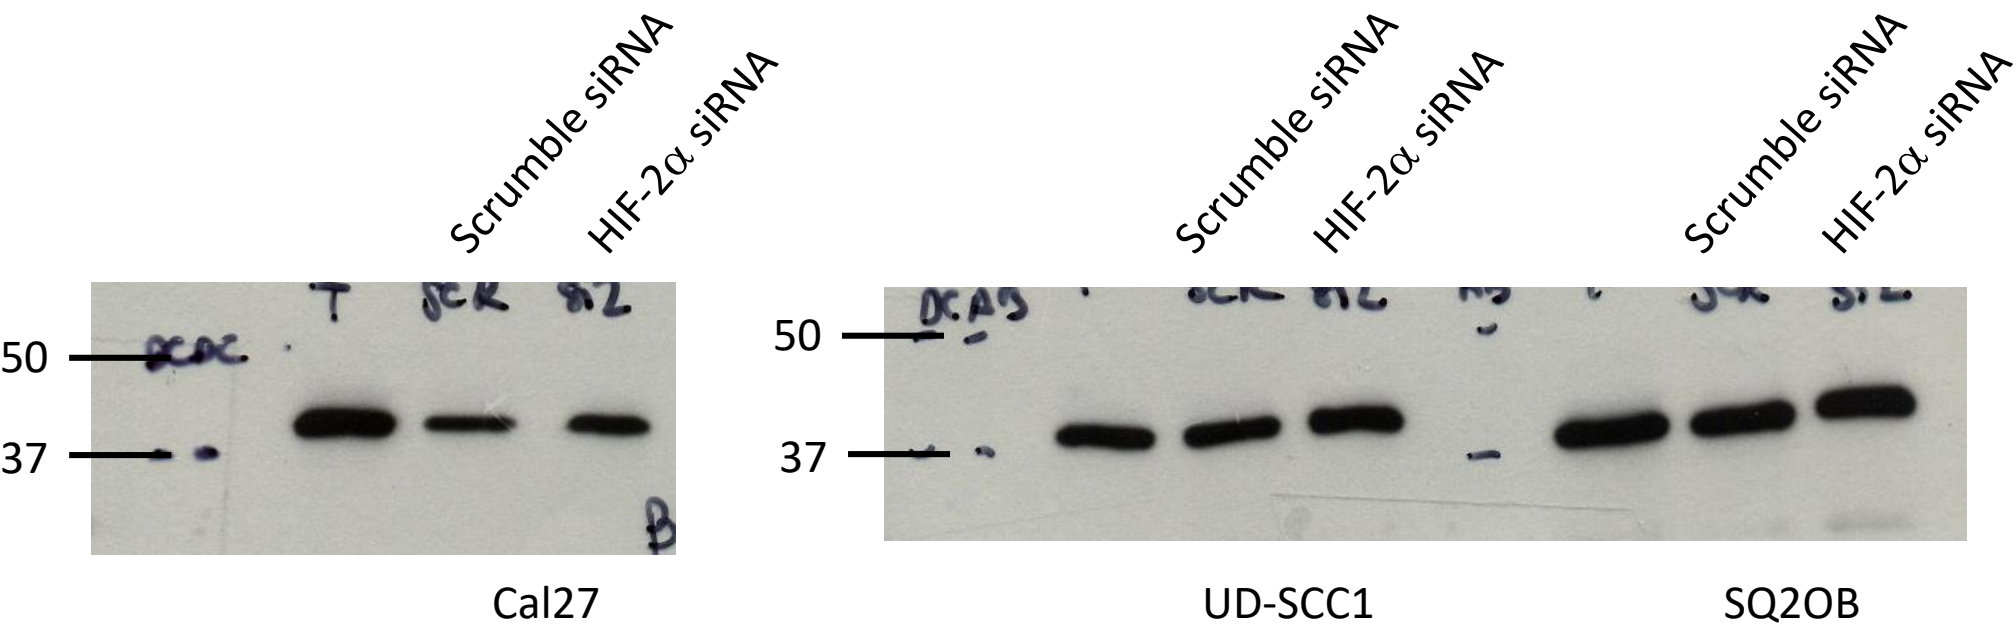

Supplement: s1 [file s1]
